# Supplementary material for: Investigation of the anti-tumor mechanism of tirabrutinib, a highly selective Bruton’s tyrosine kinase inhibitor, by phosphoproteomics and transcriptomics
Source: PubMed Central journal article supplement (PMC10004634; doi:10.1371/journal.pone.0282166), 2023-03-10
Supplement: pone.0282166.s001.pdf [file pone.0282166.s001.pdf]

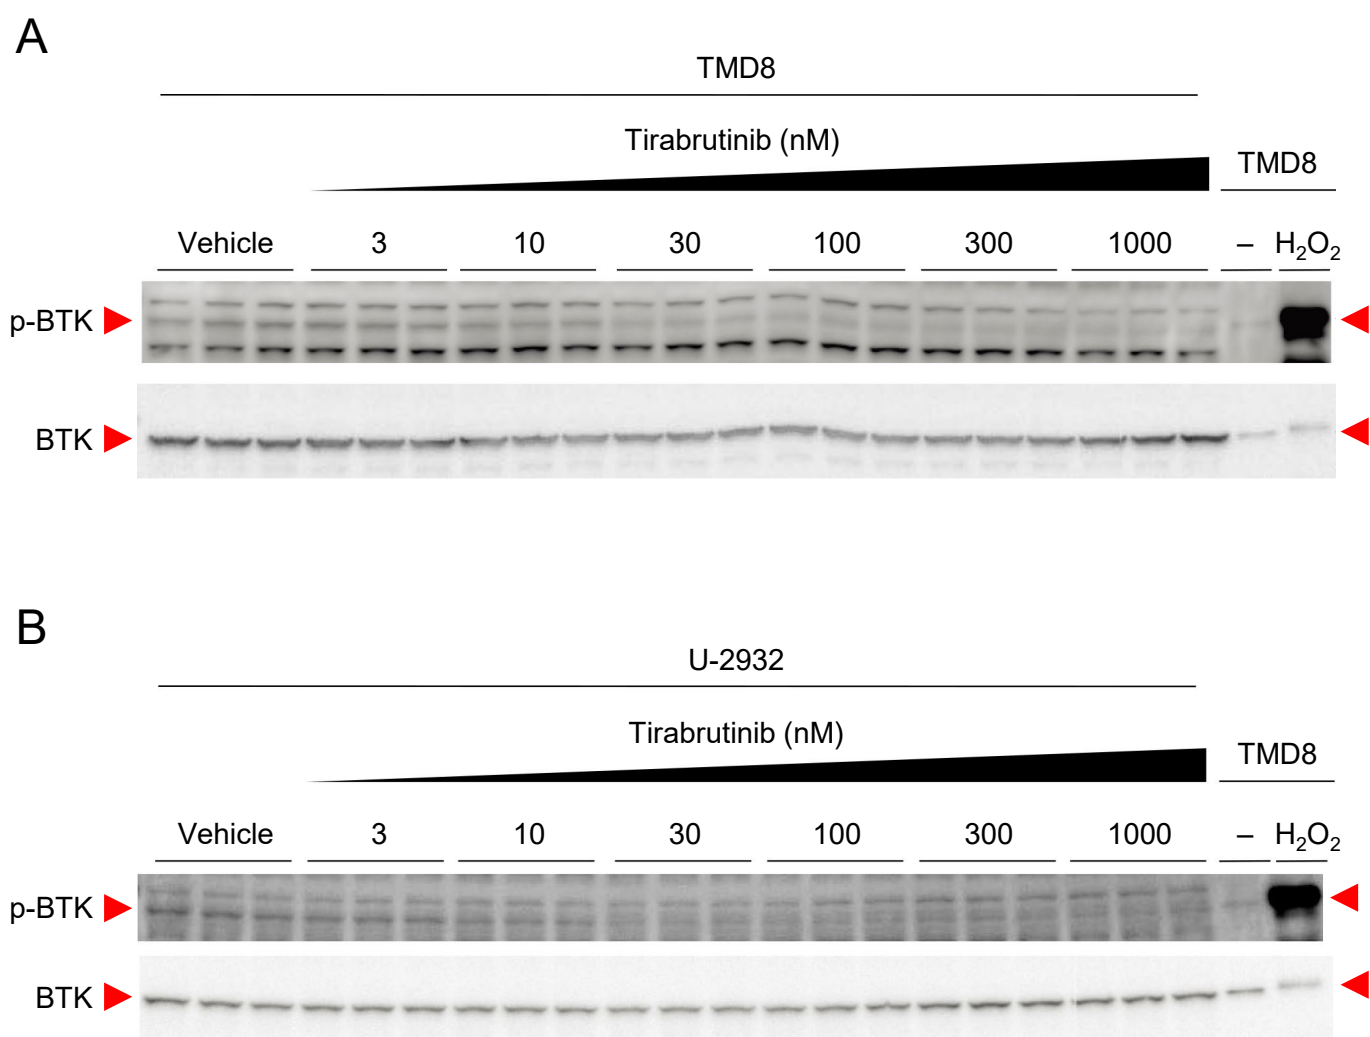

**S1 Figure. Immunoblots of lysates to evaluate BTK autophosphorylation inhibitory effects of tirabrutinib in the TMD8 and U-2932 cell lines.**

(A) TMD8 and (B) U-2932 cells were treated with vehicle or different concentrations of tirabrutinib and incubated for 4 h at 37°C (5% CO<sub>2</sub>/95% air). Autophosphorylated BTK (p-BTK) (upper) and total BTK (BTK) (lower) proteins were detected by western blot analysis. TMD8 cells were unstimulated (–) or stimulated using H<sub>2</sub>O<sub>2</sub> and used as a marker for the detection of p-BTK and BTK.
