# Supplementary material for: Investigation of the anti-tumor mechanism of tirabrutinib, a highly selective Bruton’s tyrosine kinase inhibitor, by phosphoproteomics and transcriptomics
Source: PubMed Central journal article supplement (PMC10004634; doi:10.1371/journal.pone.0282166), 2023-03-10
Supplement: pone.0282166.s002.pdf [file pone.0282166.s002.pdf]

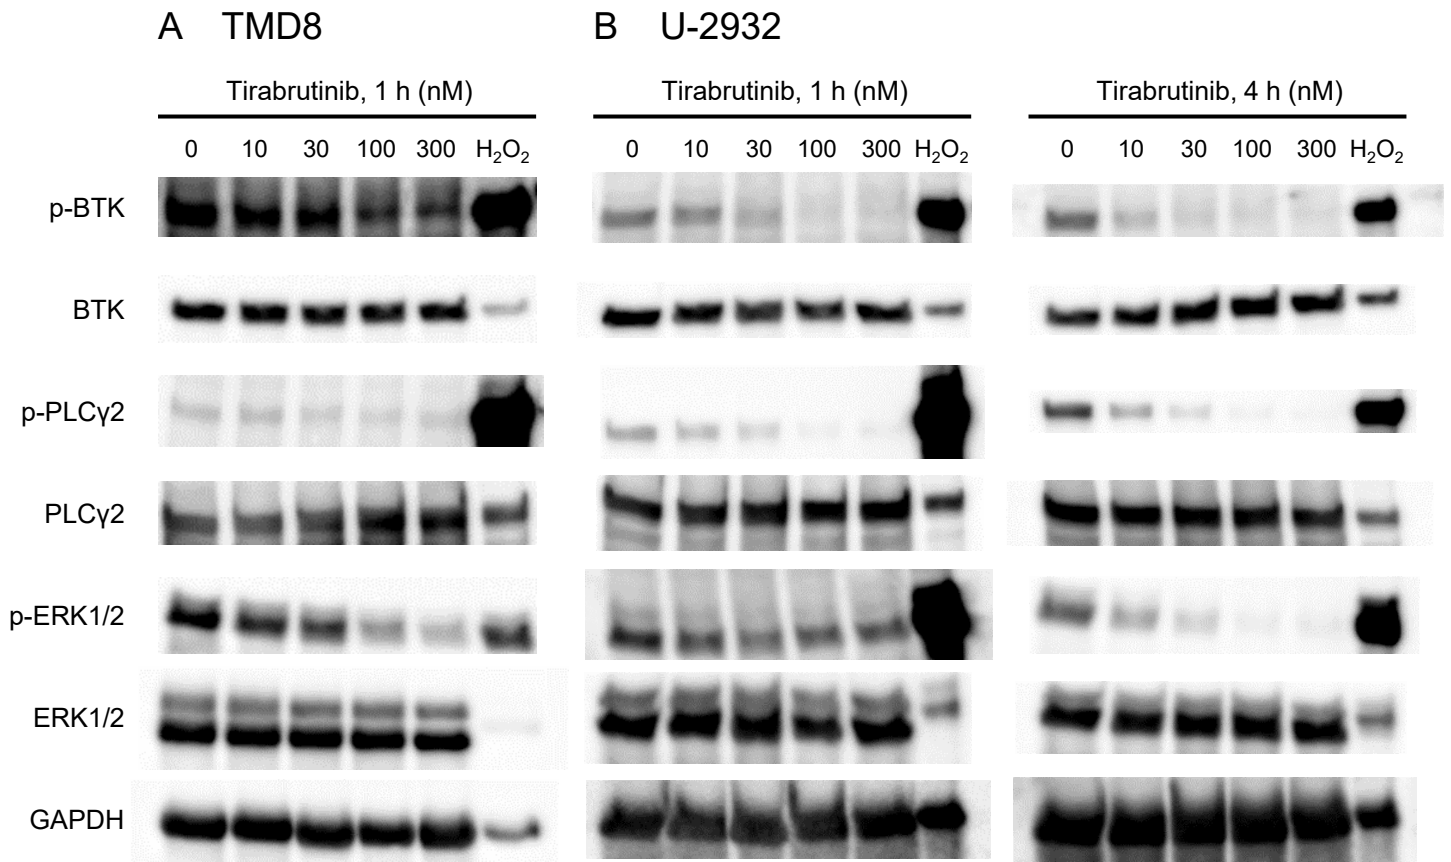

**S2 Figure. Immunoblots for p-BTK, BTK, p-PLC $\gamma$ 2, PLC $\gamma$ 2, p-ERK1/2, ERK1/2, and GAPDH in lysates of TMD8 and U-2932 cells treated with or without tirabrutinib (0–300 nM).**

(A) TMD8 cells or (B) U-2932 cells were treated with tirabrutinib (10, 30, 100, or 300 nM) or DMSO and incubated for 1 and/or 4 h at 37°C in 5% CO<sub>2</sub>/95% air. Autophosphorylated BTK (p-BTK, Tyr-223), total BTK (BTK), phosphorylated PLC $\gamma$ 2 (p-PLC $\gamma$ 2, Tyr-759), total PLC $\gamma$ 2 (PLC $\gamma$ 2), phosphorylated ERK1/2 (p-ERK, Thr-202/204), total ERK1/2, and GAPDH proteins were detected by western blot analysis. TMD8 cells were stimulated using H<sub>2</sub>O<sub>2</sub> and used as a marker for the detection of p-BTK, p-PLC $\gamma$ 2, and p-ERK.
