# Supplementary material for: Investigation of the anti-tumor mechanism of tirabrutinib, a highly selective Bruton’s tyrosine kinase inhibitor, by phosphoproteomics and transcriptomics
Source: PubMed Central journal article supplement (PMC10004634; doi:10.1371/journal.pone.0282166), 2023-03-10
Supplement: pone.0282166.s003.pdf [file pone.0282166.s003.pdf]

**A**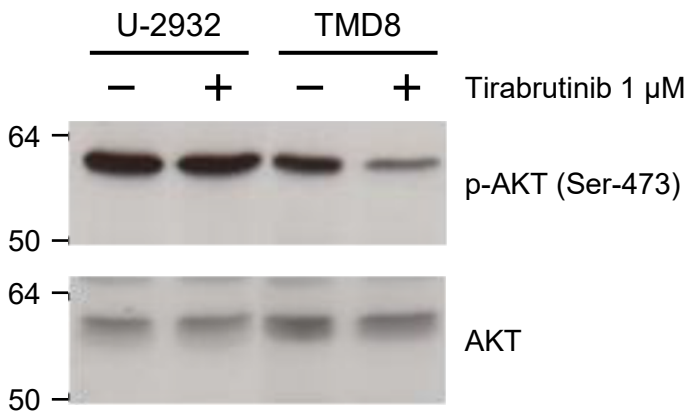**B**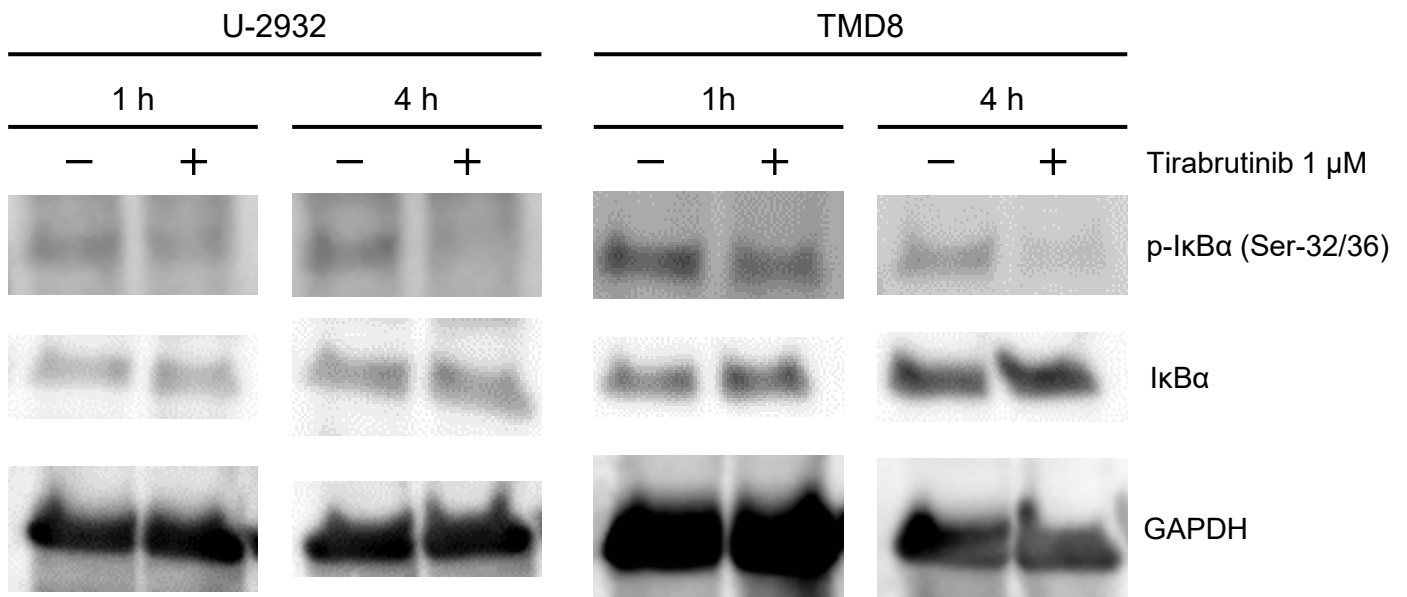

**S3 Figure. Immunoblots of p-AKT, AKT, p-IκBα, IκBα, and GAPDH in lysates of TMD8 and U-2932 cells treated with or without tirabrutinib (1 μM).**

U-2932 cells and TMD8 were treated with tirabrutinib (1 μM) or DMSO and incubated for 1 or 4 h at 37°C in 5% CO<sub>2</sub>/95% air. **(A)** Phosphorylated AKT (p-AKT, Ser-473) and total AKT (AKT) proteins were detected by western blot analysis. **(B)** Phosphorylated IκBα (p-IκBα, Ser-32/36), total IκBα (IκBα), and GAPDH proteins were detected by western blot analysis.
