# Supplementary material for: Investigation of the anti-tumor mechanism of tirabrutinib, a highly selective Bruton’s tyrosine kinase inhibitor, by phosphoproteomics and transcriptomics
Source: PubMed Central journal article supplement (PMC10004634; doi:10.1371/journal.pone.0282166), 2023-03-10
Supplement: pone.0282166.s005.pdf [file pone.0282166.s005.pdf]

SHAFFER\_IRF4\_TARGETS\_I  
N\_PLASMA\_CELL\_VS\_  
MATURE\_B\_LYMPHOCYTE

SHAFFER\_IRF4\_TARGETS  
\_IN\_ACTIVATED\_B\_  
LYMPHOCYTE

20 genes

|                 |                 |
|-----------------|-----------------|
| AGPAT2          | NFIL3           |
| AMPD1           | NR4A1           |
| <b>APOBEC3B</b> | PABPC4          |
| <b>ATF3</b>     | PCYT1B          |
| ATF4            | PDIA4           |
| AVPI1           | <b>PDK1</b>     |
| C11orf24        | <b>PIM2</b>     |
| CCPG1           | <b>PRDM1</b>    |
| <b>CD38</b>     | <b>SLC12A4</b>  |
| DDIT3           | <b>SORT1</b>    |
| <b>DNAJB5</b>   | <b>SPATS2</b>   |
| DNAJB9          | <b>SSR1</b>     |
| <b>DUSP5</b>    | SUB1            |
| F12             | TM9SF4          |
| FKBP11          | <b>TNFAIP3</b>  |
| <b>FZD2</b>     | <b>TNFRSF17</b> |
| <b>GFPT1</b>    | <b>TRAM1</b>    |
| HSP90B1         | <b>TUFT1</b>    |
| HSPB1           | TXNDC5          |
| ITPKA           | <b>UBE2J1</b>   |
| <b>MAN2A1</b>   | ZFP36           |
| NAMPT           |                 |

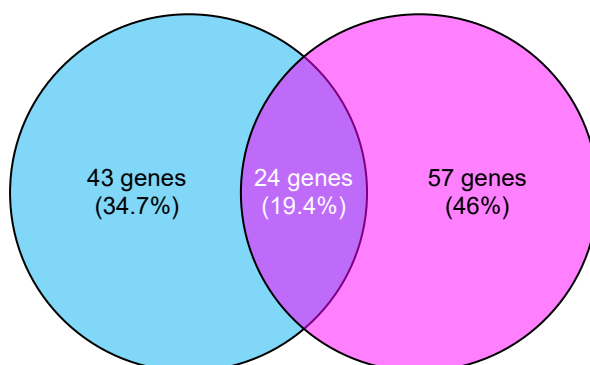

19 genes

|                |                 |
|----------------|-----------------|
| <b>ADGRE5</b>  | KTN1            |
| <b>AHCY</b>    | LDHA            |
| <b>ALDOC</b>   | LONP1           |
| ATP5F1D        | MARS1           |
| AURKA          | ME2             |
| <b>BCL2</b>    | <b>MSMO1</b>    |
| CCNC           | <b>MVK</b>      |
| <b>CTH</b>     | MYC             |
| CYCS           | OSBPL8          |
| <b>CYP51A1</b> | PAICS           |
| EIF2S2         | <b>PGK1</b>     |
| <b>FADS1</b>   | PNP             |
| <b>FDFT1</b>   | PRPF40A         |
| GARS1          | RIN2            |
| GART           | RPP30           |
| GFOD1          | <b>SCD</b>      |
| GID4           | <b>SEPTIN11</b> |
| GNG10          | SERF1A          |
| GNPDA1         | SLC31A1         |
| GOLGA7         | SNX9            |
| GRSF1          | <b>SQLE</b>     |
| GTF2IRD1       | SRPK1           |
| <b>HILPDA</b>  | <b>ST3GAL1</b>  |
| HIVEP2         | <b>TAGLN2</b>   |
| HK2            | <b>TBC1D8</b>   |
| HMBS           | VDAC1           |
| <b>HMGCR</b>   | XPOT            |
| IDH1           | YARS1           |
| <b>INSIG1</b>  |                 |

Overlapped 10 genes

|              |               |
|--------------|---------------|
| ACP1         | KRAS          |
| B3GNT2       | LDLR          |
| BMI1         | NDRG1         |
| BMP6         | PAM           |
| <b>BSPRY</b> | <b>SLAMF7</b> |
| CANX         | SLC3A2        |
| <b>CASP3</b> | <b>TERT</b>   |
| <b>CAV1</b>  | <b>TIMP2</b>  |
| CCL3         | TNFRSF12A     |
| <b>CFLAR</b> | <b>UAP1</b>   |
| <b>ELL2</b>  | UCK2          |
| <b>IRF4</b>  | VEGFA         |

Red: Core enrichment genes

**S5 Figure. Core enrichment genes of gene set enrichment analysis for interferon regulatory factor target genes in the two gene sets.**
