# Supplementary material for: Investigation of the anti-tumor mechanism of tirabrutinib, a highly selective Bruton’s tyrosine kinase inhibitor, by phosphoproteomics and transcriptomics
Source: PubMed Central journal article supplement (PMC10004634; doi:10.1371/journal.pone.0282166), 2023-03-10
Supplement: pone.0282166.s006.pdf [file pone.0282166.s006.pdf]

**A**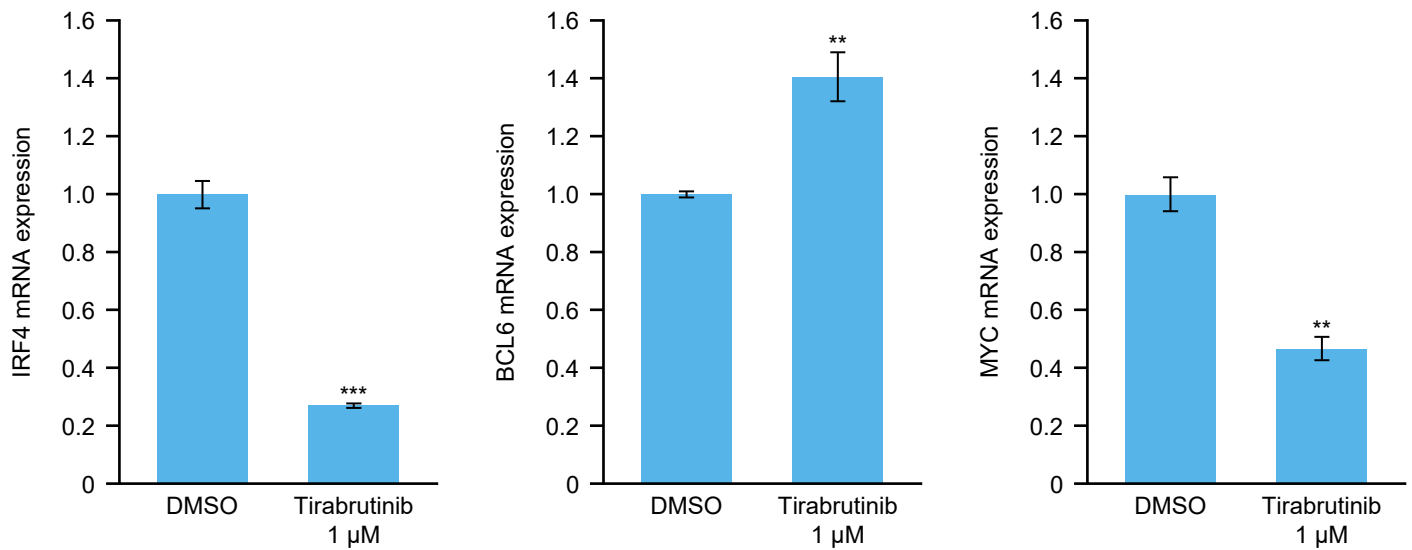**B**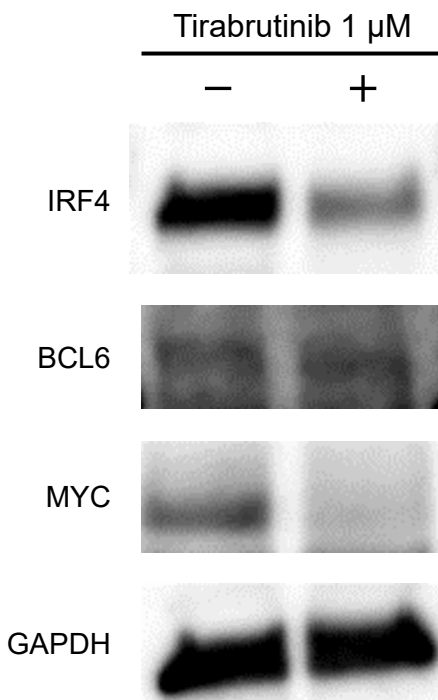**S6 Figure. Gene and protein expression in TMD8 cells treated with or without tirabrutinib.**

TMD8 were treated with tirabrutinib (1 μM) or DMSO and incubated for 24 h at 37°C in 5% CO<sub>2</sub>/95% air.

(A) RNA was isolated and polymerase chain reaction (PCR) was performed. All PCRs were performed in triplicate, and the mRNA expression of GAPDH was used as an internal control. The *t* test was used to compare mRNA expression in the DMSO- and tirabrutinib-treated groups. A *P*-value of less than 5% was considered statistically significant. \*\*: *P* < 0.01, \*\*\*: *P* < 0.001. (B) IRF4, BCL6, MYC, and GAPDH proteins were detected by western blot analysis.
