# Supplementary material for: Investigation of the anti-tumor mechanism of tirabrutinib, a highly selective Bruton’s tyrosine kinase inhibitor, by phosphoproteomics and transcriptomics
Source: PubMed Central journal article supplement (PMC10004634; doi:10.1371/journal.pone.0282166), 2023-03-10

S1 Figure A\_Original Image\_Marker (TMD8\_Tirabrutinib\_4 h)

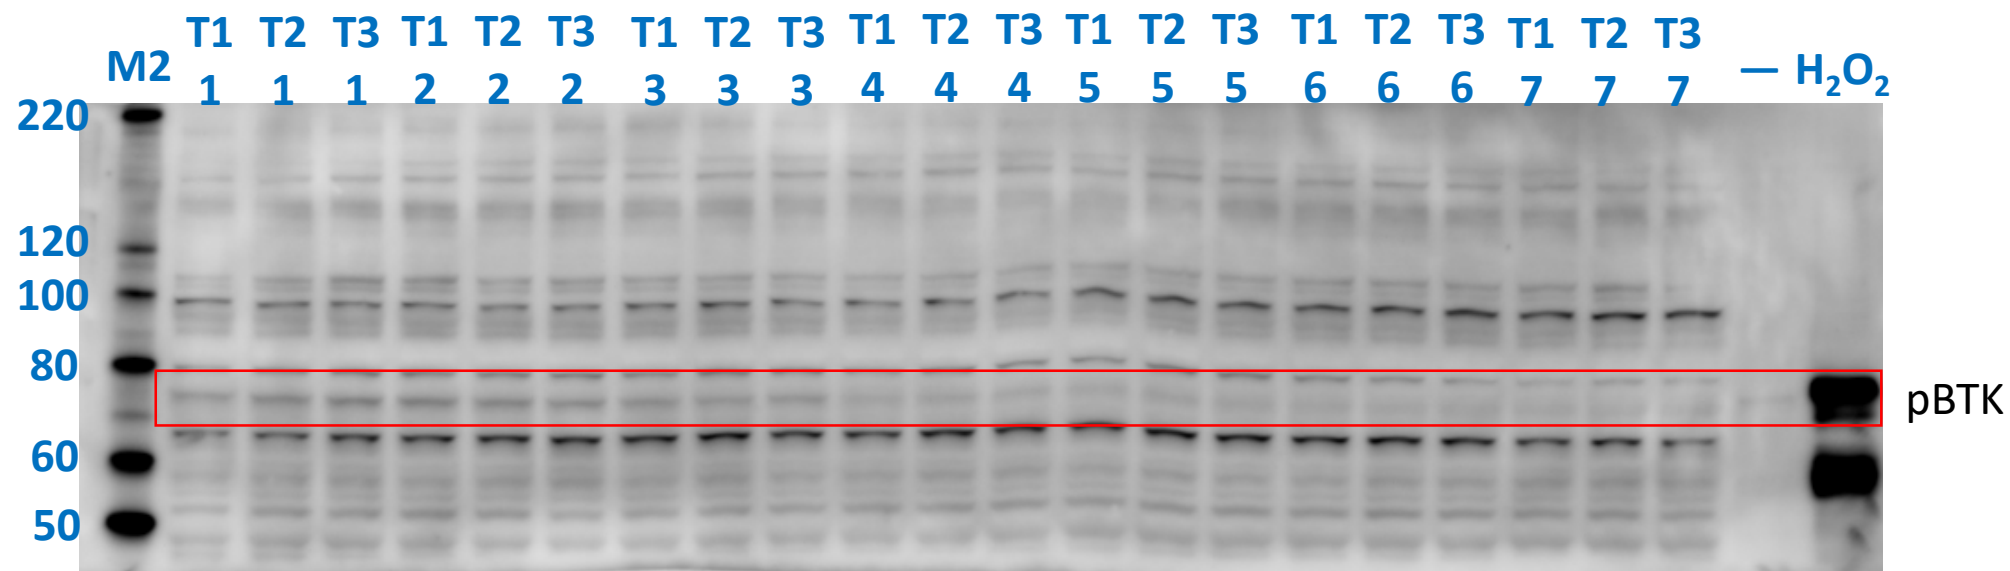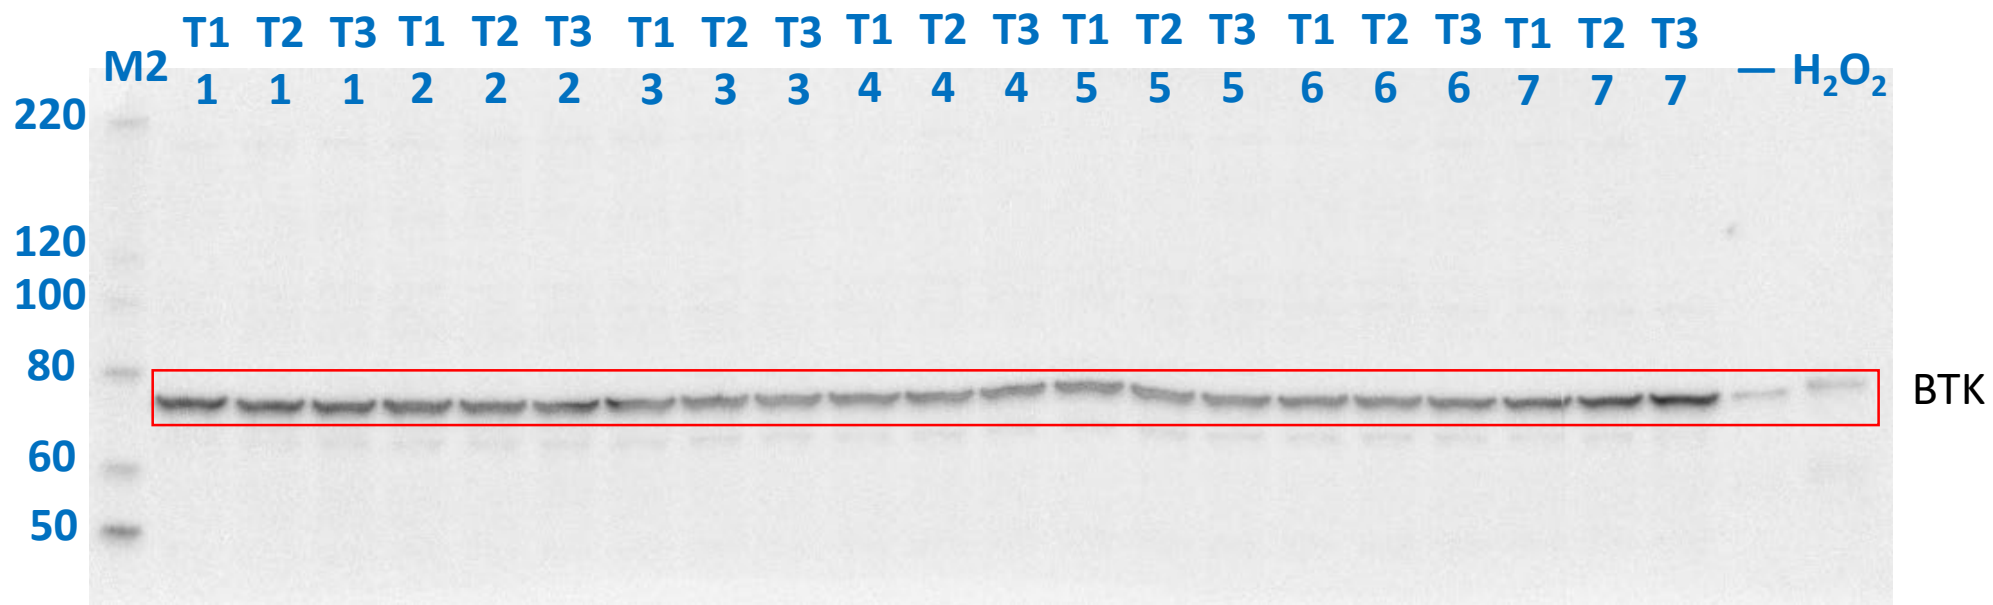

S1 Figure B\_Original Image\_Marker (U-2932\_Tirabrutinib\_4 h)

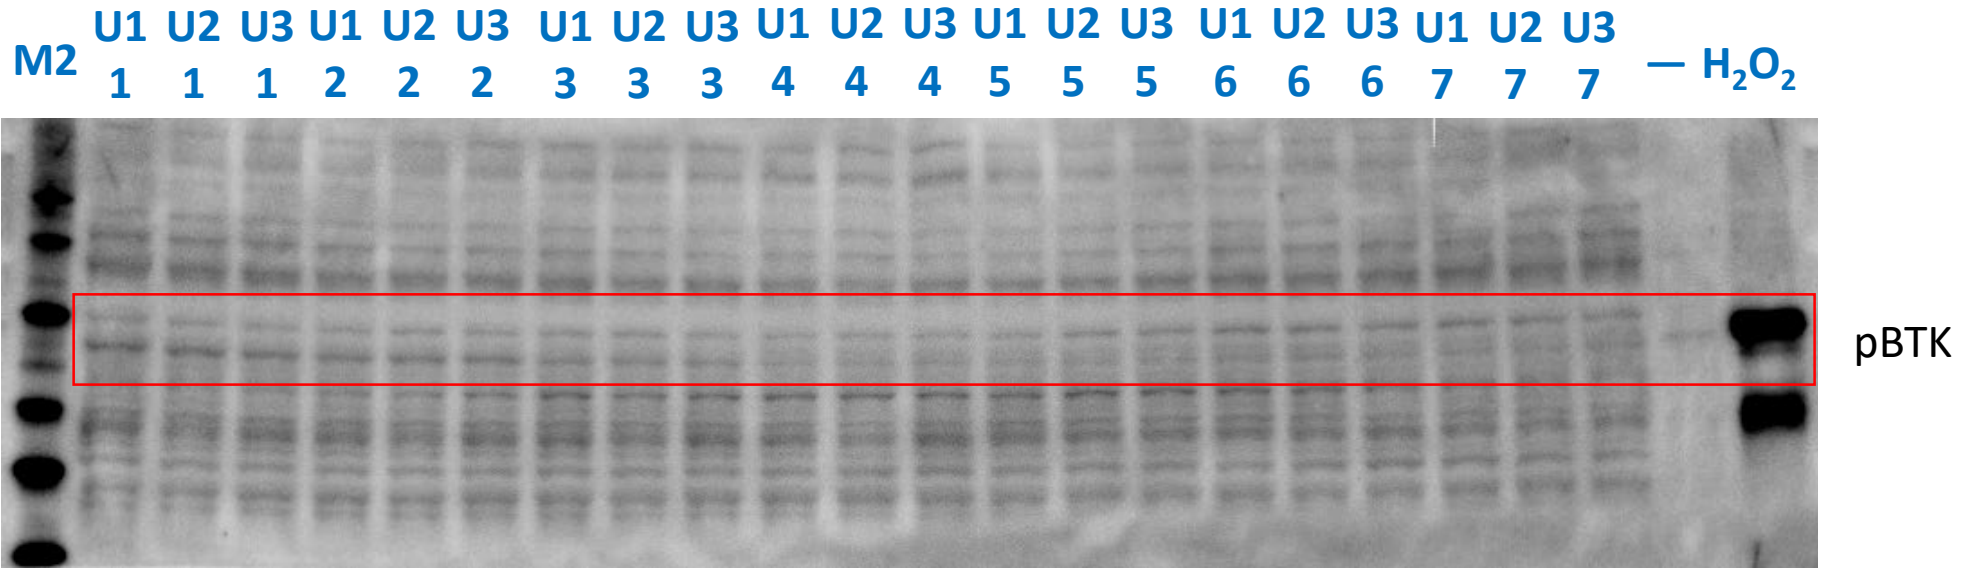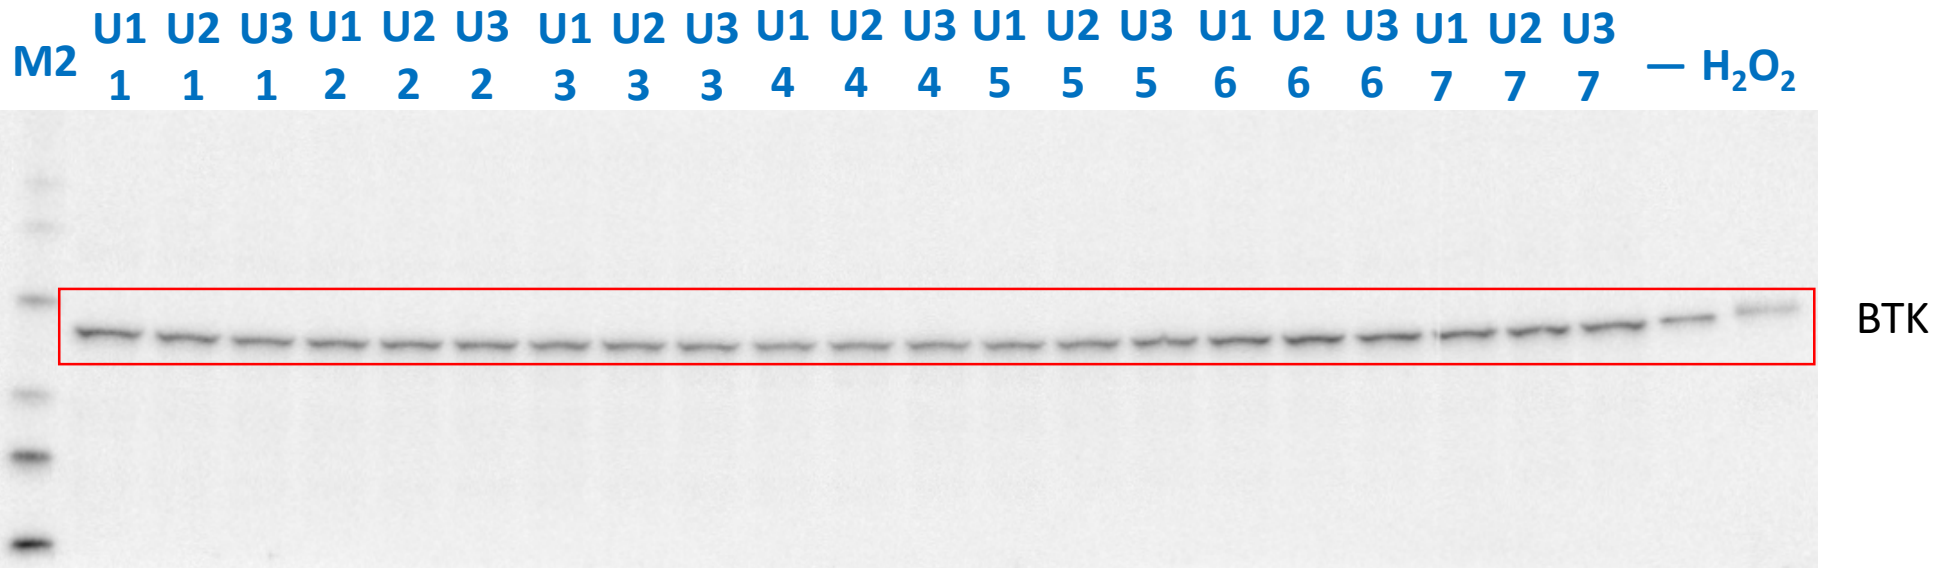

Supplement: pone.0282166.s015.pdf [file pone.0282166.s015.pdf]
