# Supplementary material for: Investigation of the anti-tumor mechanism of tirabrutinib, a highly selective Bruton’s tyrosine kinase inhibitor, by phosphoproteomics and transcriptomics
Source: PubMed Central journal article supplement (PMC10004634; doi:10.1371/journal.pone.0282166), 2023-03-10

# S3 Figure A\_Original Image\_Marker

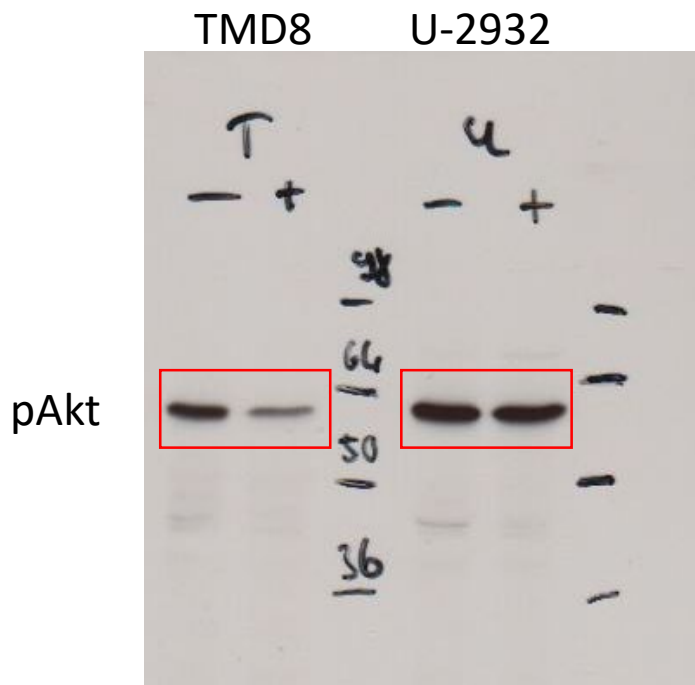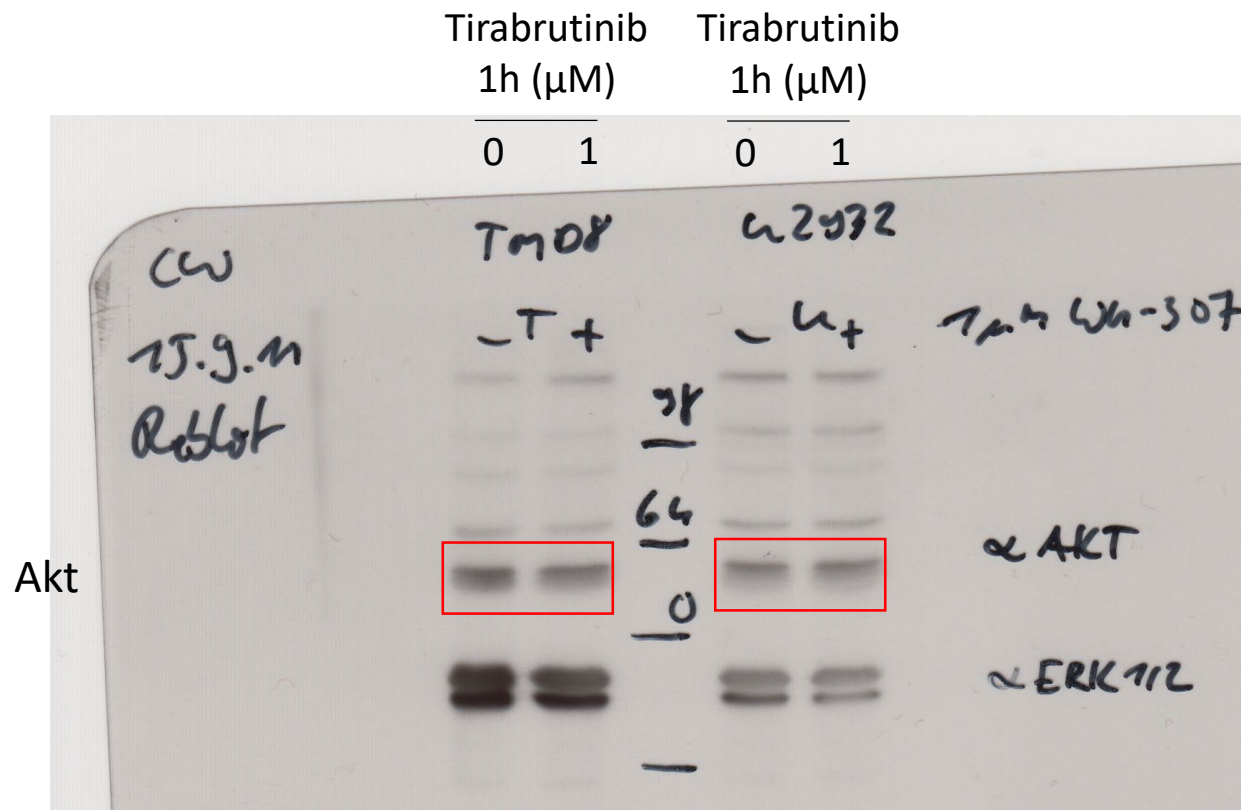

# S3 Figure B\_Original Image\_Marker

## U2932

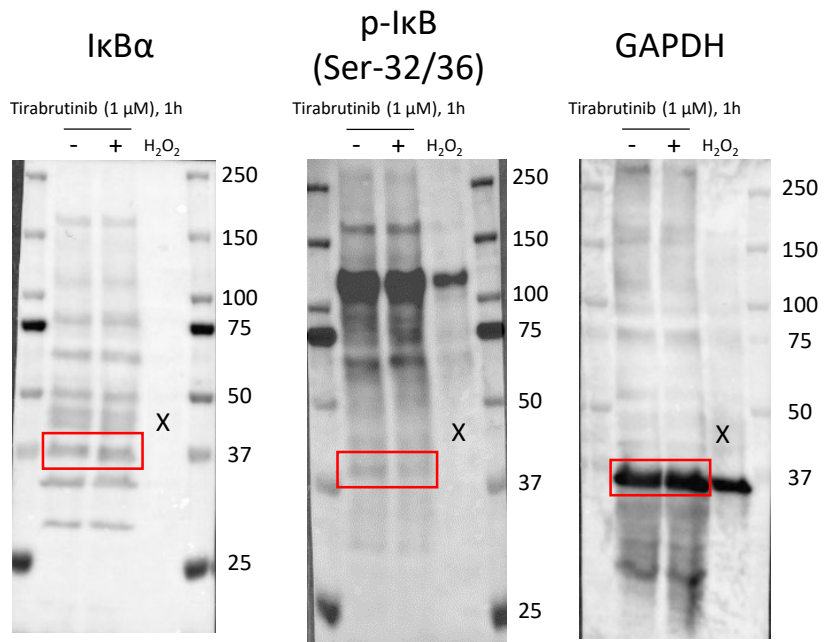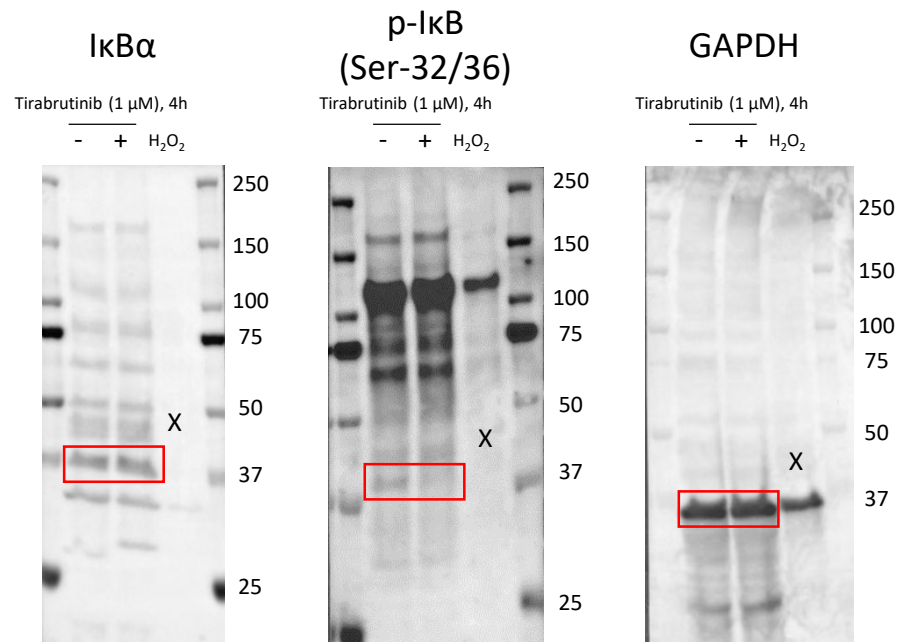

## TMD8

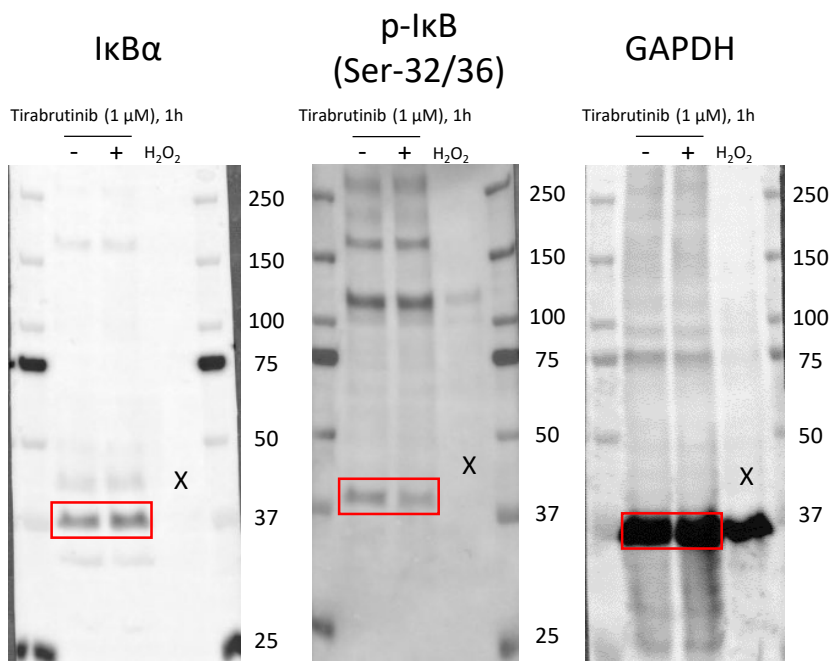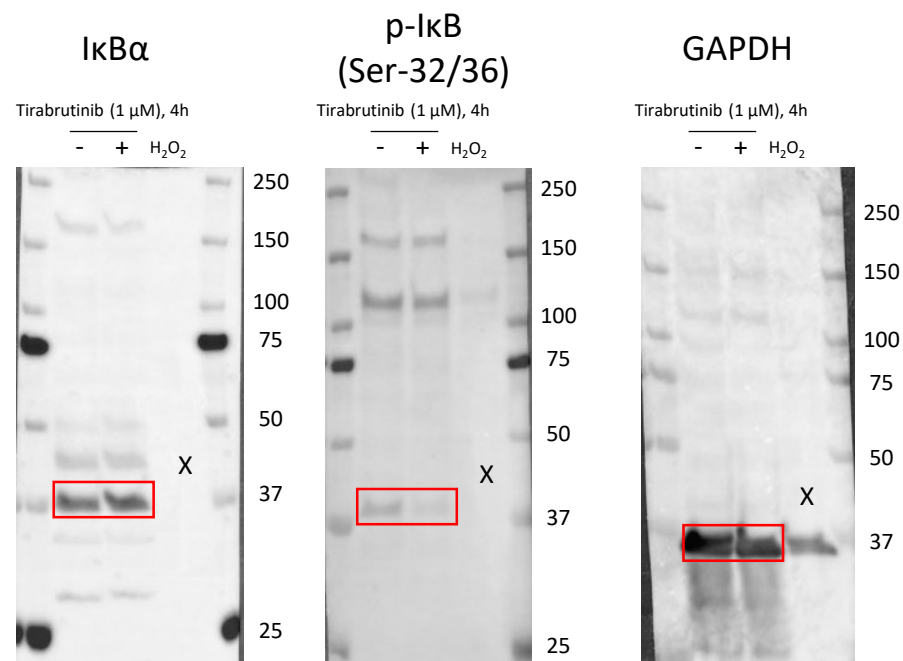

Supplement: pone.0282166.s017.pdf [file pone.0282166.s017.pdf]
