# Supplementary material for: Investigation of the anti-tumor mechanism of tirabrutinib, a highly selective Bruton’s tyrosine kinase inhibitor, by phosphoproteomics and transcriptomics
Source: PubMed Central journal article supplement (PMC10004634; doi:10.1371/journal.pone.0282166), 2023-03-10

# S6 Figure B\_Original Image\_Marker

IRF4

BCL6

MYC

GAPDH

Tirabrutinib (1  $\mu$ M)

Tirabrutinib (1  $\mu$ M)

Tirabrutinib (1  $\mu$ M)

Tirabrutinib (1  $\mu$ M)

- +

- +

- +

- +

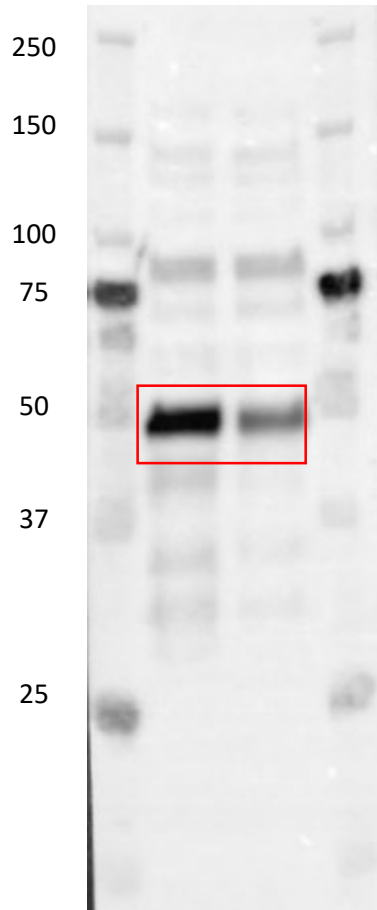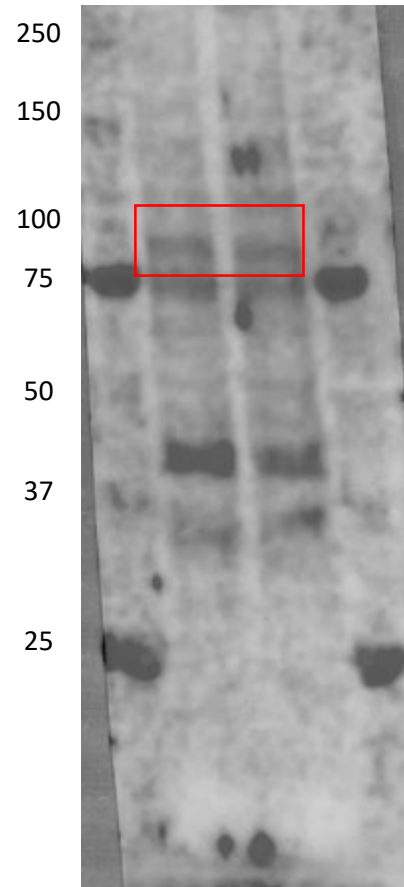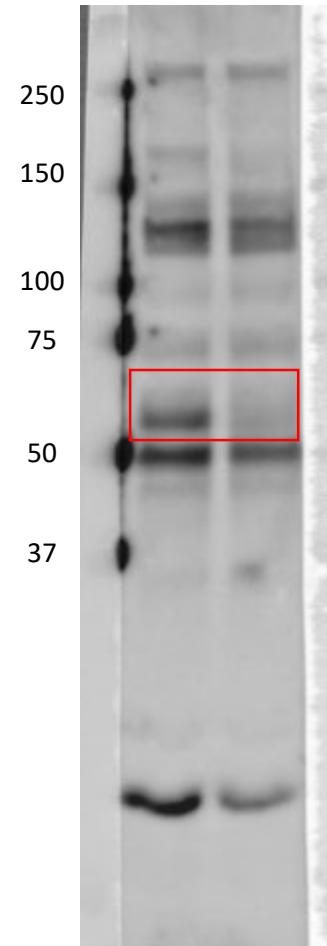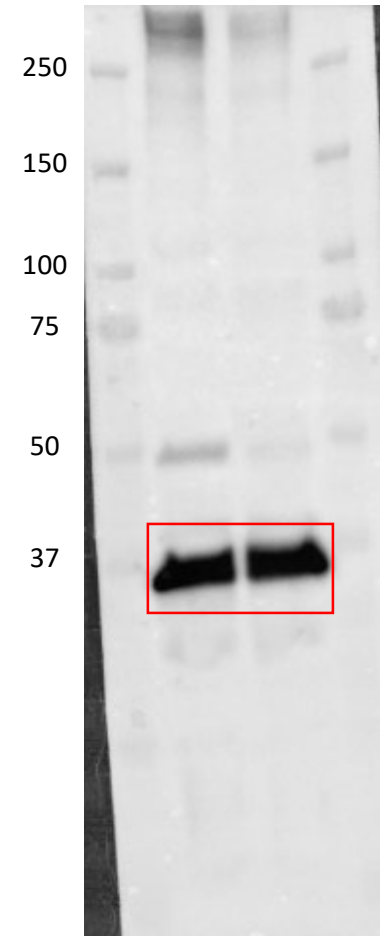

Supplement: pone.0282166.s018.pdf [file pone.0282166.s018.pdf]
